# Supplementary material for: Piezo1 induces endothelial responses to shear stress via soluble adenylyl Cyclase-IP3R2 circuit
Source: PubMed Central journal article supplement — iScience. 2023 Apr 11;26(5):106661. doi: 10.1016/j.isci.2023.106661 (PMC10164902; doi:10.1016/j.isci.2023.106661), 2023-04-11
Supplement: mmc1.pdf [file mmc1.pdf]

iScience, Volume 26

## **Supplemental information**

### **Piezo1 induces endothelial responses to shear stress via soluble adenylyl Cyclase-IP<sub>3</sub>R2 circuit**

**Dianicha Santana Nunez, Asrar B. Malik, Quinn Lee, Sang Joon Ahn, Arnold Coctecon-Murillo, Dana Lazarko, Irena Levitan, Dolly Mehta, and Yulia A. Komarova**

## Supplemental Figures

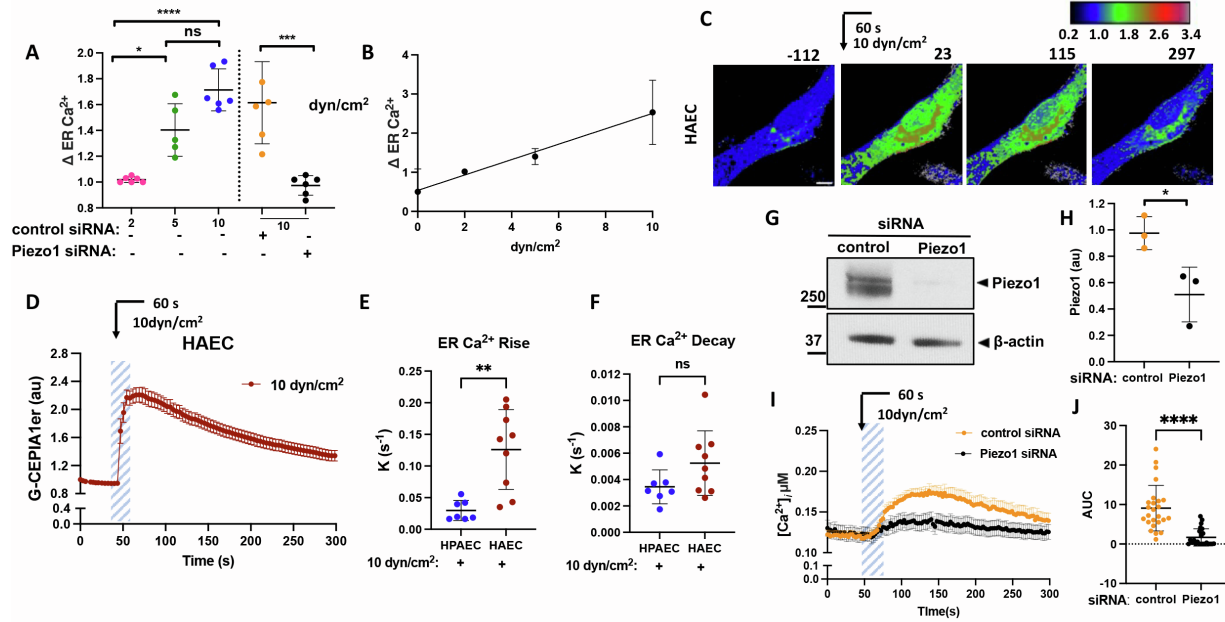

**Figure S1. Activation of Piezo1 by laminar shear stress induces transient mobilization of  $\text{Ca}^{2+}$  into the ER lumen. Supplemental data related to Figure 1.**

**A.** Peak changes in  $[\text{Ca}^{2+}]_{\text{ER}}$  calculated from data in **1B**;  $n=5-7$  cell per group from 3 independent experiments; left; mean  $\pm$  SD; \*,  $p < 0.05$ ; \*\*\*\*,  $p < 0.0001$ , ANOVA with Tukey's post hoc test; right, \*\*\*,  $p < 0.001$ , Student's  $t$  test.

**B.** Linear regression modeling of data in **A** indicating that  $\text{Ca}^{2+}$  entry to the ER is proportional to the shear stress level.

**C.** Live-cell images of G-CEPIA1er in HAE monolayers before and after application of 10  $\text{dyn/cm}^2$  fluid shear for 60 seconds; color-coding is shown in the heat map; times in seconds; scale bar, 10  $\mu\text{m}$ .

**D.** Time-dependent changes of  $[\text{Ca}^{2+}]_{\text{ER}}$  in HAE monolayers before and after application of 10  $\text{dyn/cm}^2$  shear stress for 60 seconds (highlighted area);  $n=9$  cells from 2 independent experiments; mean  $\pm$  SEM.

**E.** Rate constants of ER  $\text{Ca}^{2+}$  rise calculated from data in **D** compared to data in Fig **1C** for 10  $\text{dyn/cm}^2$  shear stress; mean  $\pm$  SD; \*\*,  $p < 0.01$ , Student's  $t$  test.

**F.** Rate constants of ER  $Ca^{2+}$  decay calculated from data in **D** compared to data in Fig **1C** for 10 dyn/cm<sup>2</sup> shear stress; mean  $\pm$  SD; ns, not significant, Student's *t* test.

**G.** Western blot analysis of Piezo1 in endothelial cells monolayer pre-treated with control and Piezo1 siRNA;  $\beta$ -actin, loading control.

**H.** Quantification of data in **H**; data are presented as 3 biological replicates from 3 independent experiments; mean  $\pm$  SD; \*,  $p < 0.05$ , Student's *t* test.

**I.** Time-dependent changes of  $[Ca^{2+}]_i$  before and after application of 10 dyn/cm<sup>2</sup> shear stress for 60 seconds (highlighted area) in endothelial monolayers pre-treated with control or Piezo1 siRNA; n=24-25 cells per group from 2 independent experiments; mean  $\pm$  SEM.

**J.** Changes of  $[Ca^{2+}]_i$  within the first 300s (area under the curve) after application of shear stress for 60 seconds calculated from data in **I**; mean  $\pm$  SD; \*\*\*\*,  $p < 0.0001$ , Student's *t* test.

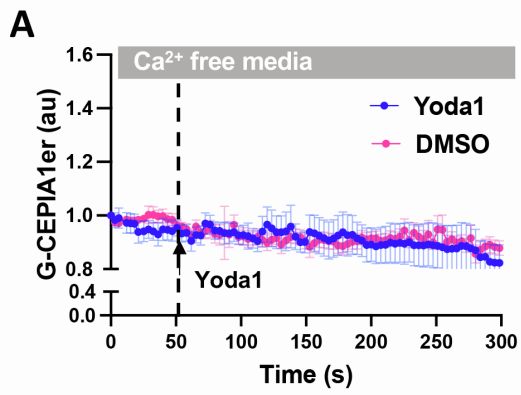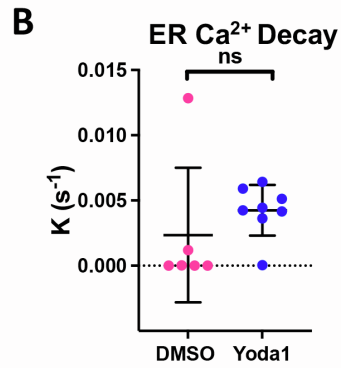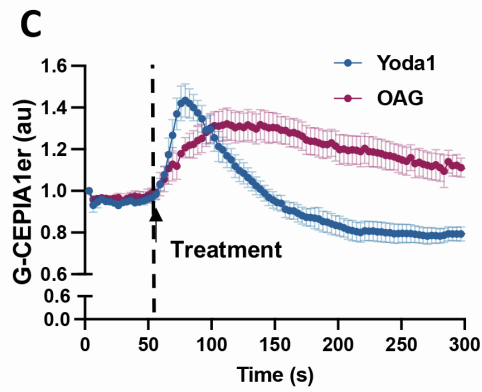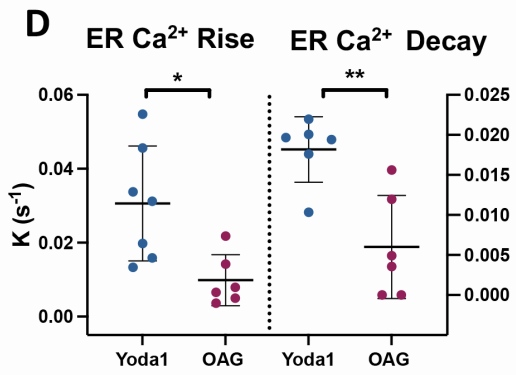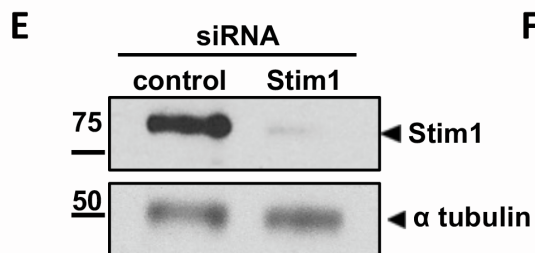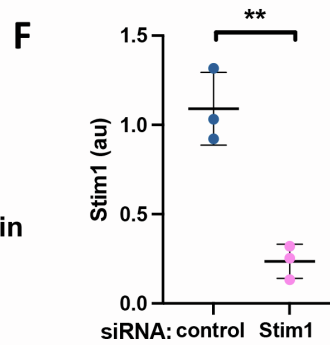

**Figure S2. Activation of Piezo1 induces rapid mobilization of Ca<sup>2+</sup> into the ER. Supplemental data related to Figure 2.**

**A.** Time-dependent changes of  $[Ca^{2+}]_{ER}$  in endothelial monolayers stimulated with Yoda1 (arrow) in nominal Ca<sup>2+</sup> free medium; n= 6-8 cells per group from 3 independent experiments.

**B.** The rate constants of ER Ca<sup>2+</sup> decay calculated from data in **A**; mean  $\pm$  SD; ns, Student's *t* test.

**C.** Time-dependent changes of  $[Ca^{2+}]_{ER}$  in endothelial monolayers stimulated with Yoda1 or OAG (arrow); n= 6-7 cells per group from 3 independent experiments; mean  $\pm$  SEM.

**D.** The rate constants of ER Ca<sup>2+</sup> rise and decay calculated from data in **C**; mean  $\pm$  SD.; \*,  $p < 0.05$ , Student's *t* test; \*\*,  $p < 0.01$ , Student's *t* test.

**E.** Western blot analysis of STIM1 in endothelial cells pre-treated with control or STIM1 siRNA;  $\alpha$ -tubulin, loading control.

**F.** Quantification of data in **F**; data are presented as 3 biological replicates from 3 independent experiments \*\*,  $p < 0.01$ , Student's *t* test.

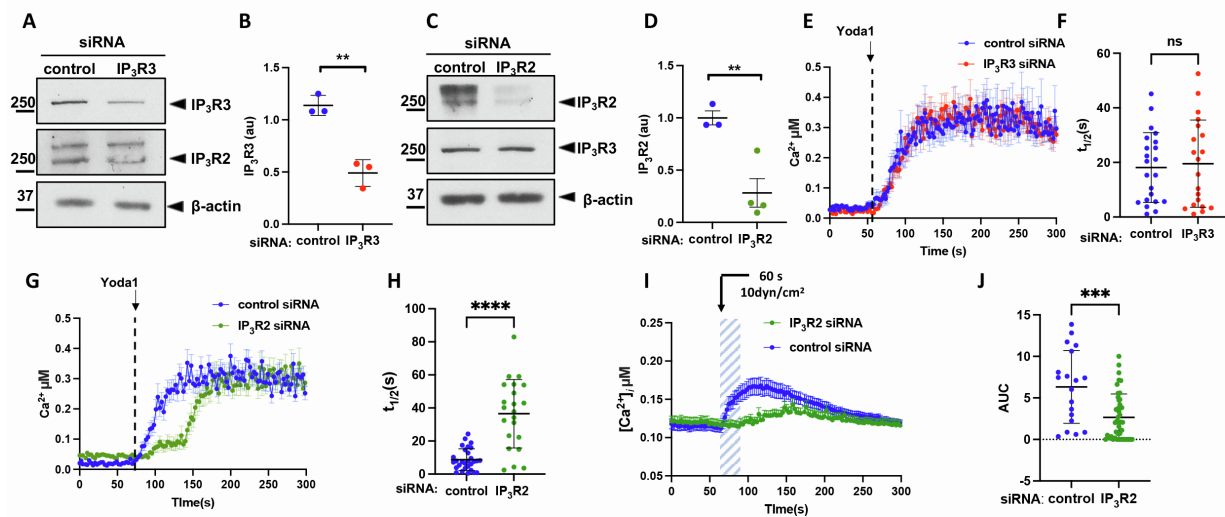

**Figure S3. Depletion of IP<sub>3</sub>R2 but not IP<sub>3</sub>R3 alleviate Piezo1 induced increase in cytosolic  $[Ca^{2+}]_i$ . Supplemental data related to Figure 3.**

**A.** Western blot analysis of IP<sub>3</sub>R2 and IP<sub>3</sub>R3 protein expressions in endothelial cells pre-treated with control or IP<sub>3</sub>R3 siRNA;  $\beta$ -actin, loading control. Depletion of IP<sub>3</sub>R3 did not alter IP<sub>3</sub>R2 protein level.

**B.** Quantification of data in **A**; data are presented as 3 biological replicates from 3 independent experiments; \*\*,  $p < 0.01$ , Student's  $t$  test.

**C.** Western blot analysis of IP<sub>3</sub>R2 and IP<sub>3</sub>R3 protein expressions in endothelial cells pre-treated with control and IP<sub>3</sub>R2 siRNA;  $\beta$ -actin, loading control. Depletion of IP<sub>3</sub>R2 did not alter IP<sub>3</sub>R3 protein level.

**D.** Quantification of data in **C**; data are presented as 4 biological replicates from 4 independent experiments; \*\*,  $p < 0.01$ , Student's  $t$  test.

**E.** Time-dependent changes of  $[Ca^{2+}]_i$  upon activation of Piezo1 with Yoda1 (arrow) in endothelial monolayers pre-treated with control or IP<sub>3</sub>R3 siRNA;  $n=18-21$  cells per group from 3 independent experiments; mean  $\pm$  SEM.

**F.** Half-time ( $t_{1/2}$ ) of cytosolic  $[Ca^{2+}]_i$  increase from data in **E.**; ns, not significant, Student's  $t$  test.

**G.** Time-dependent changes of cytosolic  $[Ca^{2+}]_i$  upon activation of Piezo1 with Yoda1 (arrow) in endothelial monolayers pre-treated with control or IP<sub>3</sub>R2 siRNA; n=22-29 cells per group from 3 independent experiments; mean  $\pm$  SEM.

**H.** Half-time ( $t_{1/2}$ ) of  $[Ca^{2+}]_i$  increase from data in **G**; \*\*\*\*,  $p < 0.0001$ , Student's  $t$  test.

**I.** Time-dependent changes of  $[Ca^{2+}]_i$  before and after application of 10 dyn/cm<sup>2</sup> shear stress for 60 seconds (highlighted area) in endothelial monolayers pre-treated with control or IP<sub>3</sub>R2 siRNA; n=19-35 cells per group from 3 independent experiments; mean  $\pm$  SEM.

**J.** Changes in  $[Ca^{2+}]_i$  within the first 300s (area under the curve) after application of shear stress for 60 seconds calculated from data in **I**; mean  $\pm$  SD; \*\*\*,  $p < 0.001$ , Student's  $t$  test.

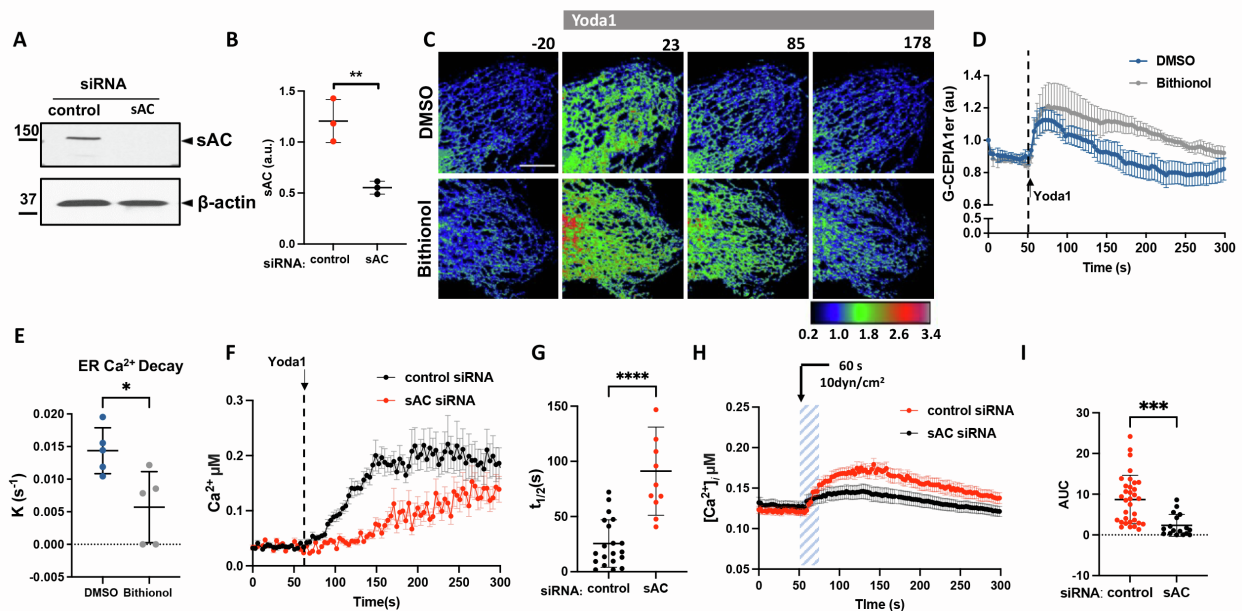

**Figure S4. Genetic and pharmacological ablation of sAC impairs Piezo1-mediated ER  $Ca^{2+}$  release and an increase in  $[Ca^{2+}]_i$ . Supplemental data related to Figure 4.**

**A.** Western blot analysis of sAC protein in endothelial monolayers pre-treated with control and sAC siRNA;  $\beta$ -actin, loading control.

**B.** Quantification of data in **A**; data are presented as 3 biological replicates from 3 independent experiments; \*\*,  $p < 0.01$ , Student's  $t$  test.

**C.** Live-cell images of G-CEPIA1er before and after activation of Piezo1 with Yoda1 in endothelial monolayers pretreated vehicle (DMSO) or sAC inhibitor bithionol; color-coding as in **1A**; time in seconds; scale bar,  $10\mu\text{m}$ .

**D.** Time course of  $[Ca^{2+}]_{ER}$  in **C**;  $n=6$  cells per group from 3 independent experiments; mean  $\pm$  SEM.

**E.** The rate constants of ER  $Ca^{2+}$  decay calculated from data in **D**; \*,  $p < 0.05$ , Student's  $t$  test

**F.** Time-dependent changes of cytosolic  $[Ca^{2+}]_i$  upon activation of Piezo1 with Yoda1 (arrow) in endothelial monolayers pre-treated with control or sAC siRNA;  $n=10-19$  cells per group from 3 independent experiments; mean  $\pm$  SEM.

**G.** Half time ( $t_{1/2}$ ) of  $[Ca^{2+}]_i$  increase from data in **F**; \*\*\*\*,  $p < 0.0001$ , Student's  $t$  test.



**H.** Time-dependent changes of cytosolic  $[Ca^{2+}]_i$  before and after application of 10 dyn/cm<sup>2</sup> shear stress for 60 seconds (highlighted area) in endothelial monolayers pre-treated with control or sAC siRNA; n=17-28 cells per group from 3 independent experiments; mean  $\pm$  SEM.

**I.** Changes in  $[Ca^{2+}]_i$  within the first 300s (area under the curve) of shear application; calculated from data in **H**; mean  $\pm$  SD; \*\*\*,  $p < 0.001$ , Student's *t* test.

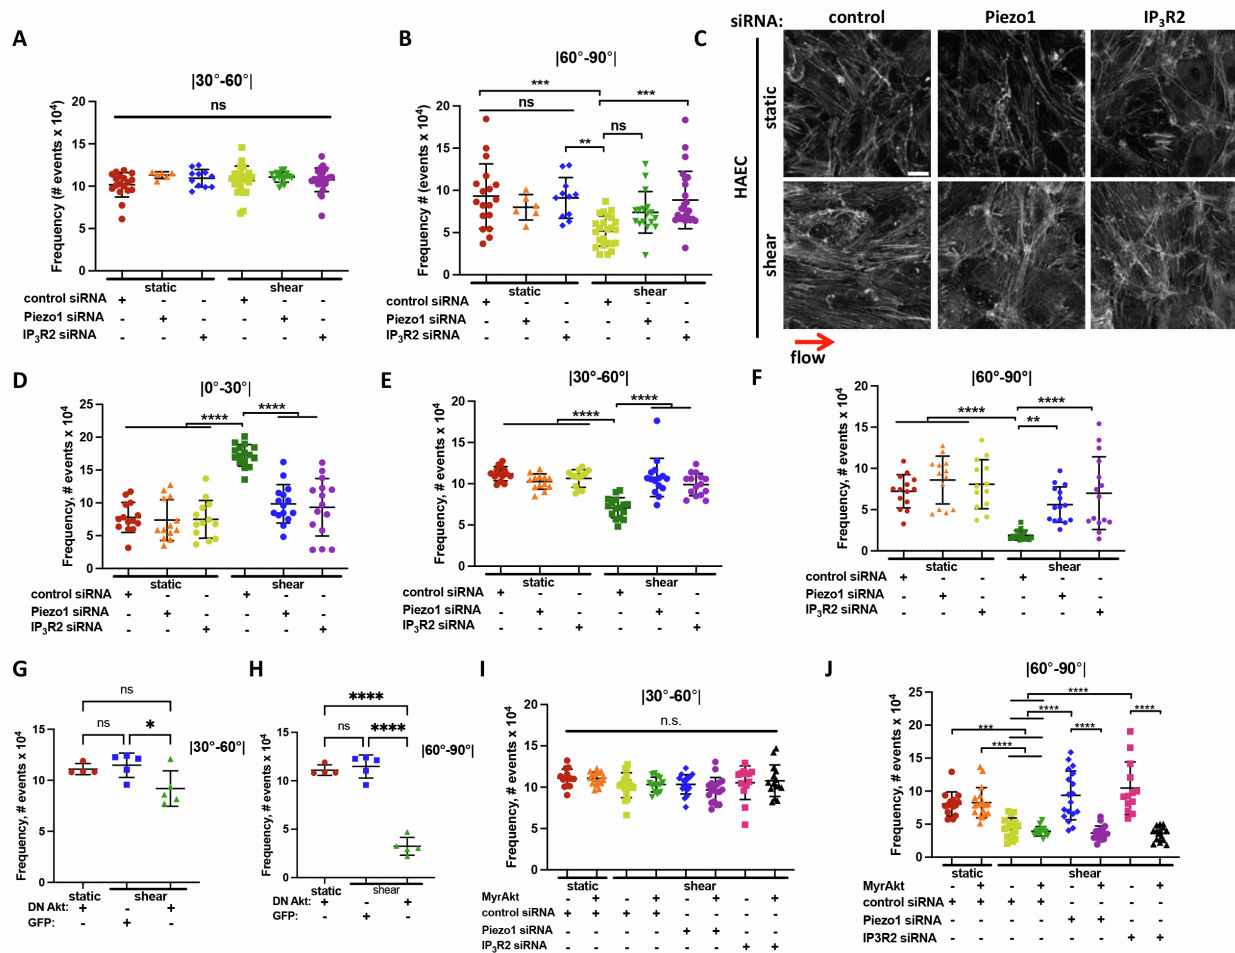

**Figure S5. Depletion of Piezo1 or IP<sub>3</sub>R2 prevents activation of Akt and consequent EC alignment in the direction of flow. Supplemental data related to Figure 5 and 6.**

**A-B.** Frequency of F-actin distribution within 30-60° (**A**) and a 60-90° (**B**) relative to the direction of flow; groups as in **Fig 5B**; n= 6-15 field per condition, from 2-4 independent experiment on static group and 17-24 fields per condition from 4 independent experiments on shear group; \*\*,  $p < 0.01$ ; \*\*\*,  $p < 0.001$ ; ns, not significant, ANOVA with Tukey's post hoc test.

**C.** Representative images of F-actin in HAEC monolayers depleted of indicated proteins and grown under static or 10 dyn/cm<sup>2</sup> laminar shear flow conditions for 24 hours; arrow indicates direction of flow; scale bar 20 μm.

**D-F.** Frequency of F-actin distribution within 0-30° (**D**), 30-60° (**E**) and 60-90° (**F**) relative to the direction of flow in HAE monolayers in C; n= 14-15 field per condition, from 3 independent experiments; mean ± SD; \*\*,  $p < 0.01$ , \*\*\*\*,  $p < 0.0001$ , ANOVA with Tukey's post hoc test.

**G-H.** Frequency of F-actin distribution within 30-60° (**G**) and 60-90° (**H**) relative to the direction of flow of cells in **Fig 6A**; n=5-10 fields per condition from 2 independent experiments; \*,  $p < 0.05$ ; \*\*\*\*,  $p < 0.0001$ , ANOVA with Tukey's post hoc test

**I-J** Frequency of F-actin distribution within 30-60° (**I**) and a 60-90° (**J**) relative to the direction of flow; groups as in **Fig 6C**; n=14 -18 fields per condition across 3 independent experiments; \*\*\*,  $p < 0.001$ ; \*\*\*\*,  $p < 0.0001$ ; ns, not significant, ANOVA with Tukey's post hoc test.
